# Supplementary material for: RNA-Seq Analysis Reveals Candidate Targets for Curcumin againstTetranychus cinnabarinus
Source: Hindawi journal article supplement (doi:10.1155/2016/2796260), 2016-01-01

Gene Saturation of CK 24 h - 1

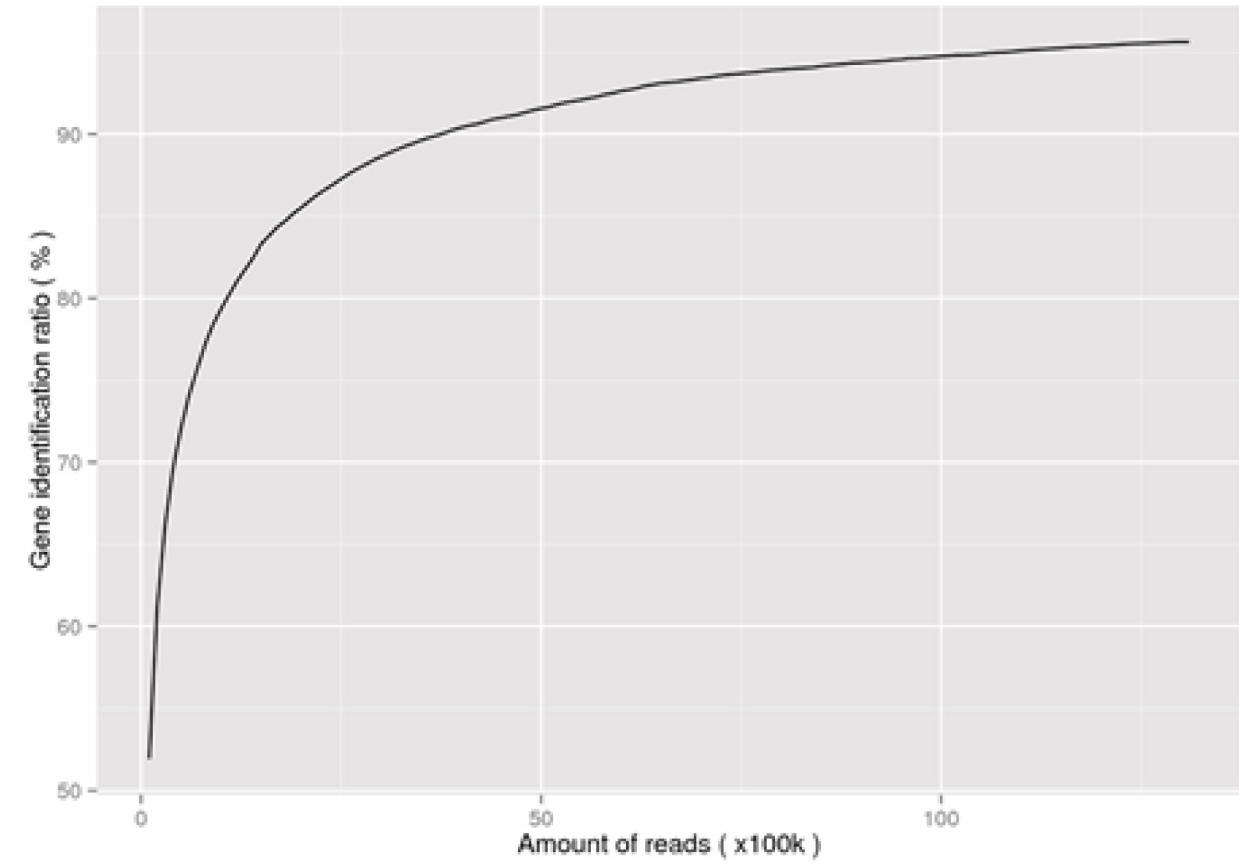

Gene Saturation of CK 24 h - 2

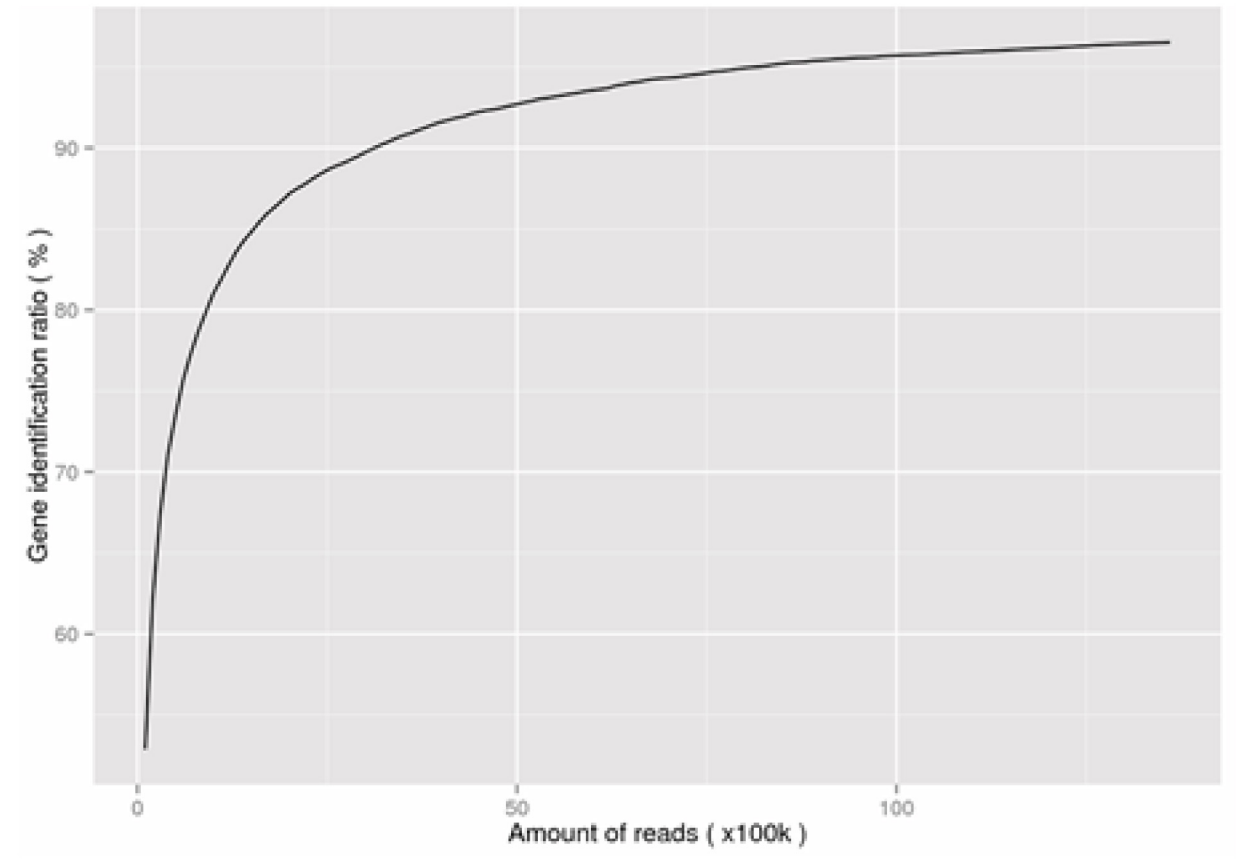

Gene Saturation of CK 48 h - 1

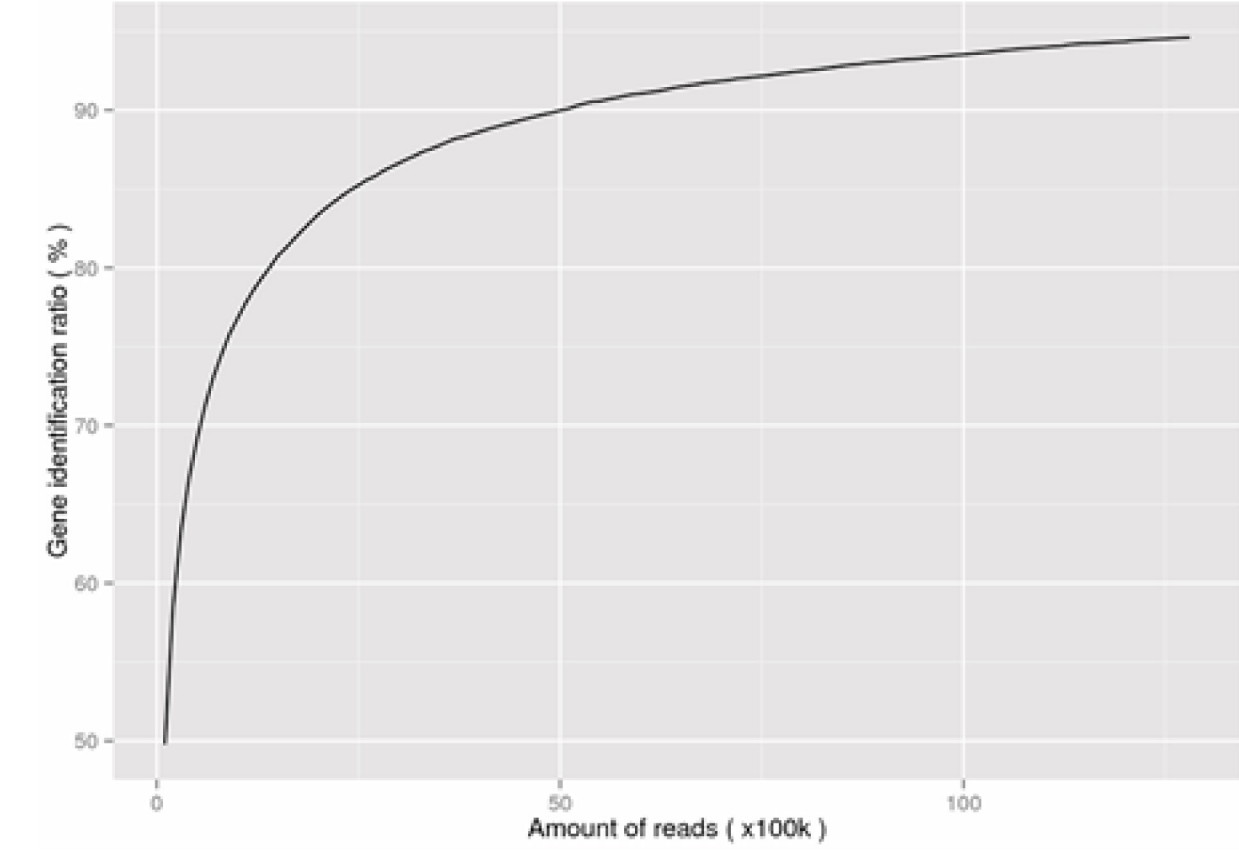

Gene Saturation of CK 48 h - 2

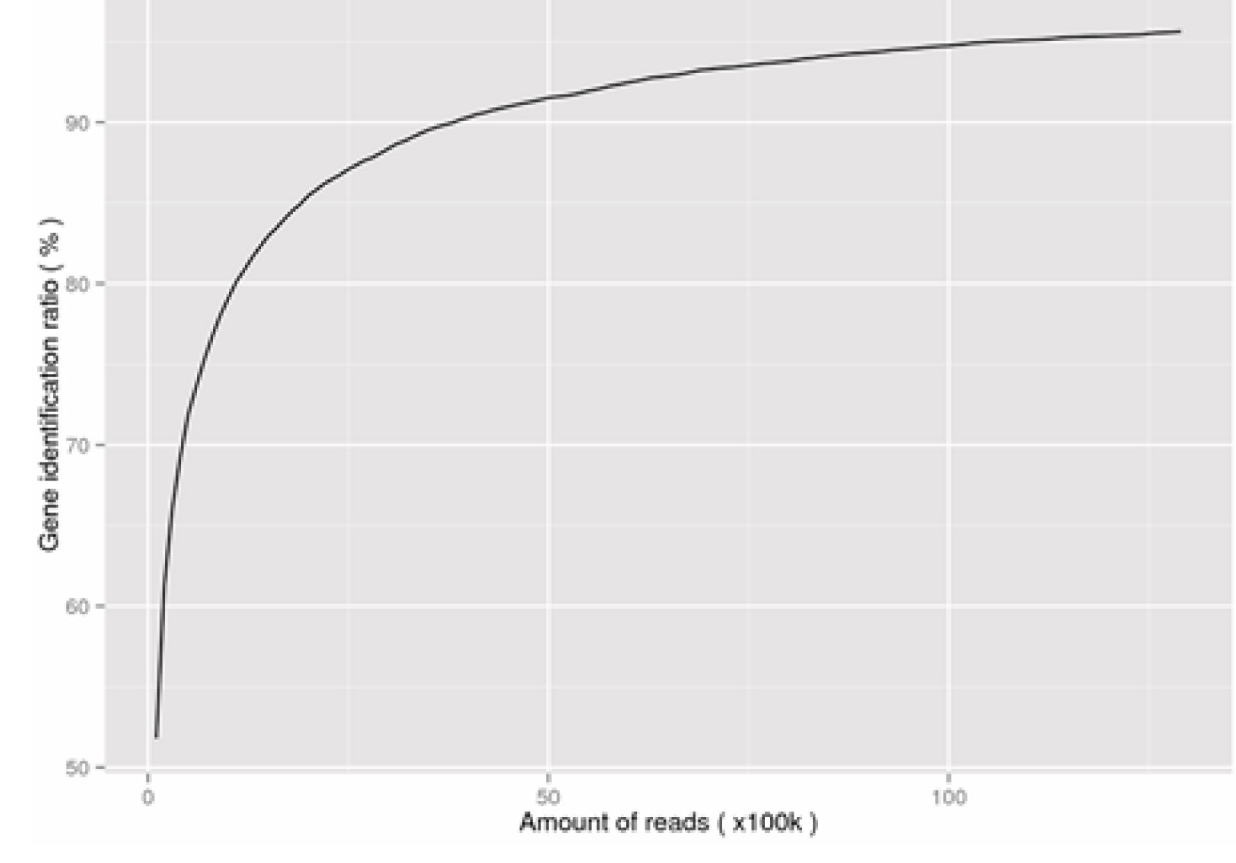

Gene Saturation of Curcumin 24 h - 1

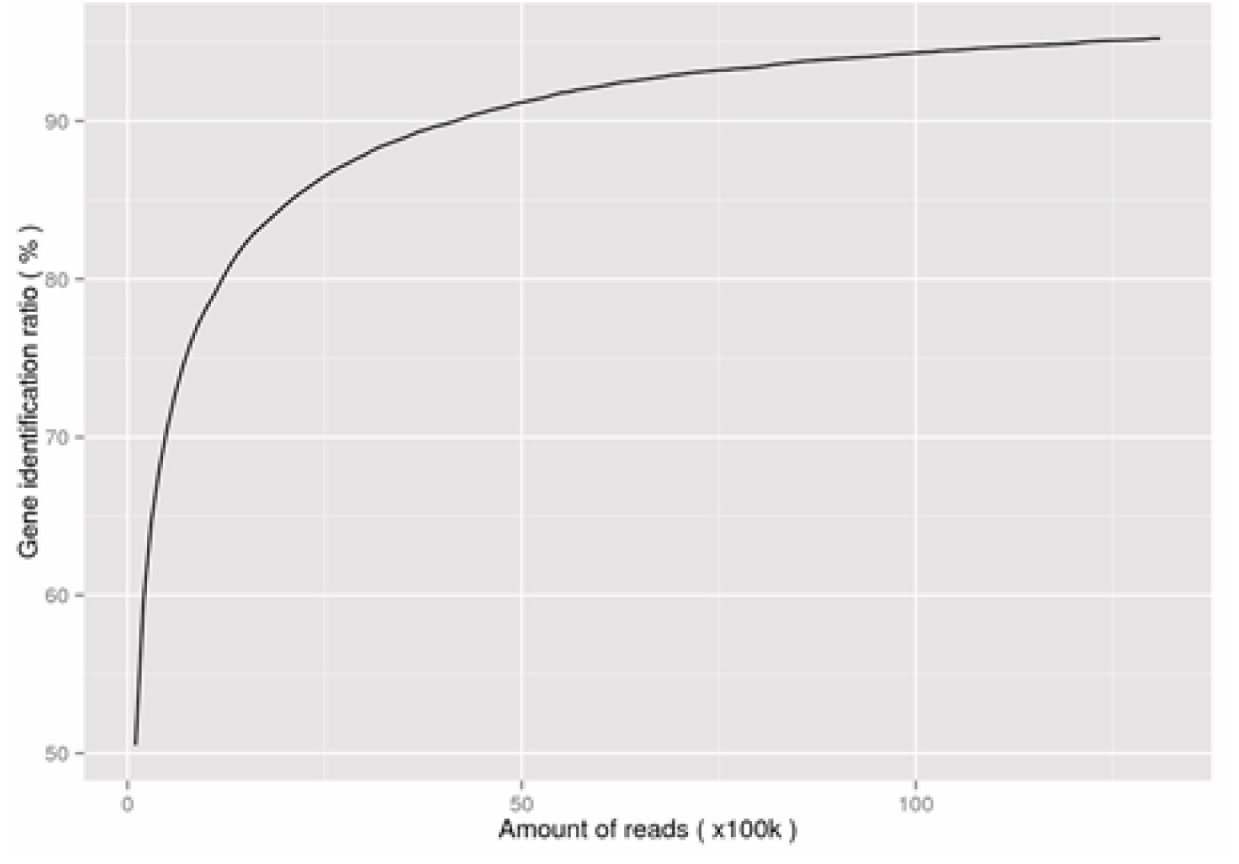

Gene Saturation of Curcumin 24 h - 2

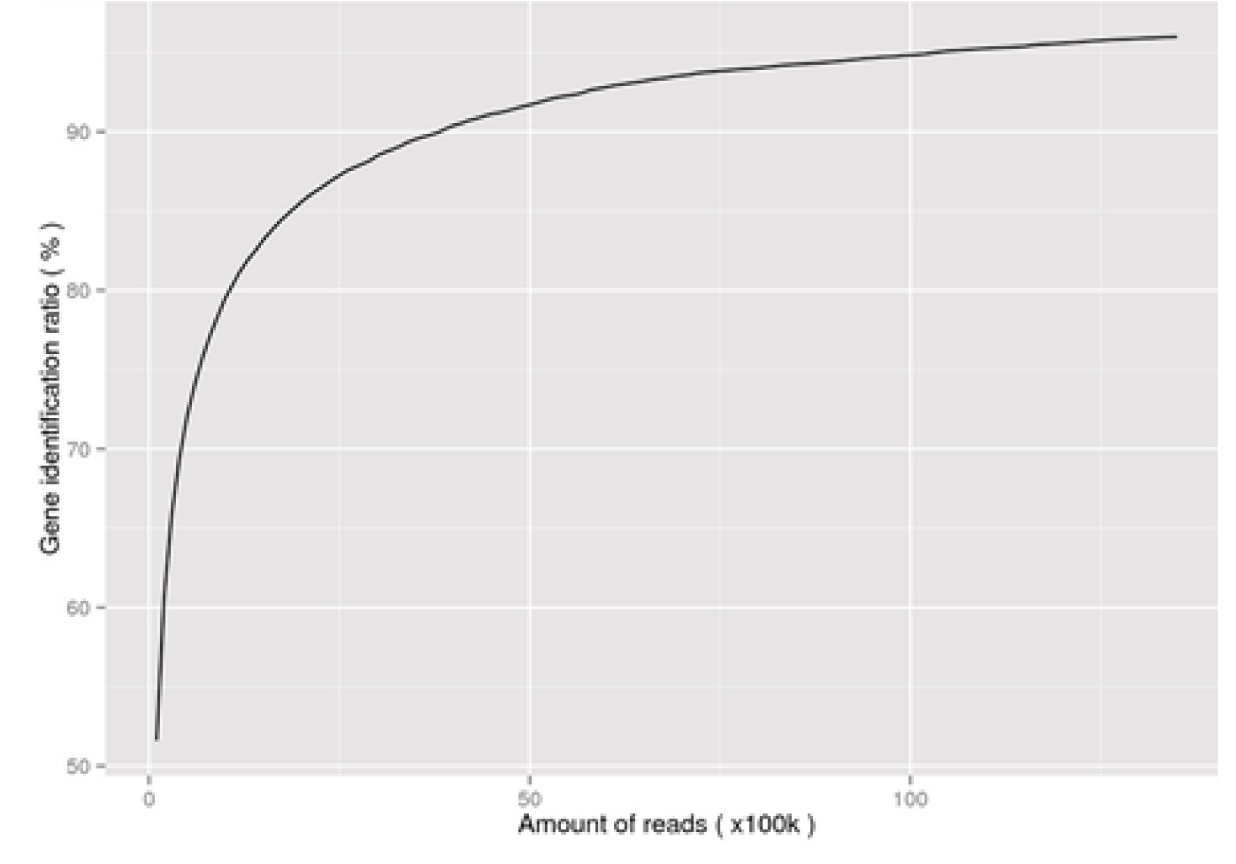

Gene Saturation of Curcumin 48 h - 1

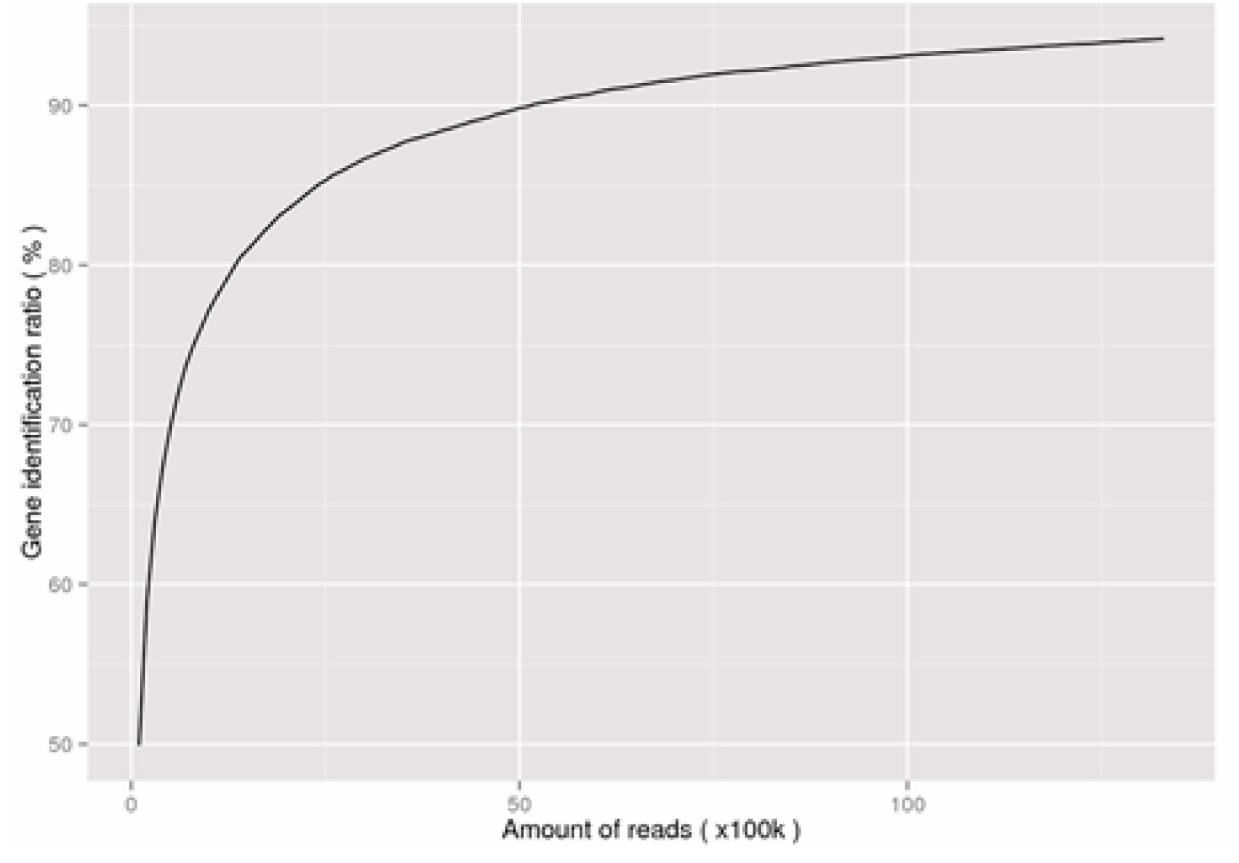

Gene Saturation of Curcumin 48 h - 2

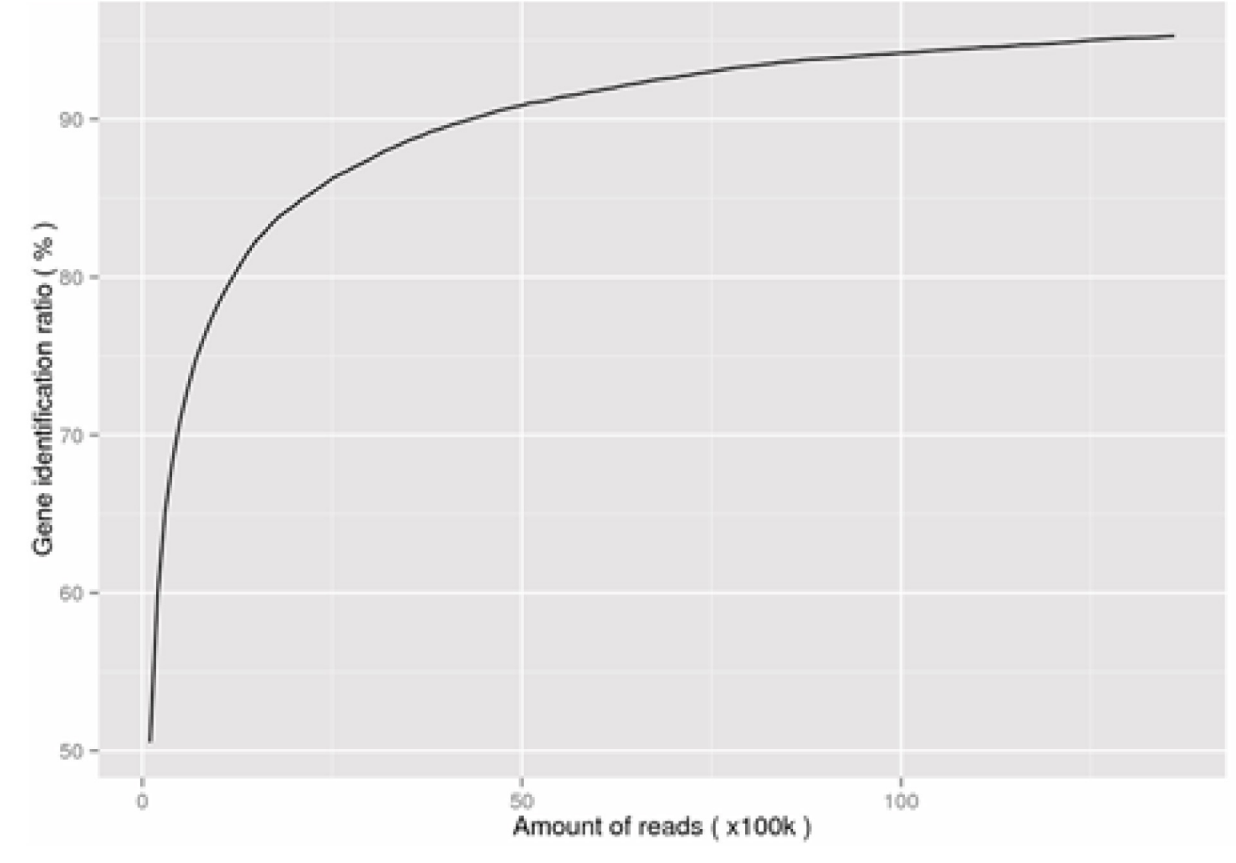

Supplement: f1 [file 2796260.f1.zip]
