# Supplementary material for: RNA-Seq Analysis Reveals Candidate Targets for Curcumin against Tetranychus cinnabarinus
Source: Biomed Res Int. 2016 Sep 8;2016:2796260. doi: 10.1155/2016/2796260 (PMC5031819; doi:10.1155/2016/2796260)
Supplement: Supplementary file 1 — The supplementary materials include one supplementary figure and 9 supplementary tables. In the supplementary figure (Figure S1), the gene saturation analysis of the sequencing libraries is showed. In the supplementary tables, first, the sequences of all the primers used in this study are provided (Table S1). Then the number of expressed genes and the complete list of differentially expressed genes at both times points are presented (Tables S2 to S5). Furthermore, the details of GO enrichment analysis and KEGG analysis of differentially expressed genes are also provided (Tables S6 to S9). [file 2796260.f1.zip › Supplementary Table S1.xlsx]

## Sheet: Sheet1
Name	Sequence(5’ to 3’)	Product Size	Source
RPS18-F	ACGTGCTGGTGAACTTACCGAAGA	99 bp	W. Sun, et al., 2009
RPS18-R	TGCCTATTCAAGAACCAAAGTGGG		W. Sun, et al., 2009
q02g00040-F	CCAAACTTGGGTCTTCAAGTATTC	118bp	This study
q02g00040-R	GCCCAAAGAAGTGAATCAAA		This study
q10g04980-F	ATTTGGAACGCCTGAATTTG	194bp	This study
q10g04980-R	CAAATGCTTCGTCATCGAAA		This study
q12g01560-F	TGCTTTCCTTCCCTCTGTTG	202bp	This study
q12g01560-R	GAAGCCTCCACGACCATAAC		This study
q16g02830-F	GTTTGACTGGGAAGCAAAGG	151bp	This study
q16g02830-R	TGTCGATGGTGTGTTATGTTGA		This study
q19g01690-F	TGATTCTCGATGAGCCAACA	198bp	This study
q19g01690-R	AGAAGGACCAGTCCATCGTG		This study
q29g01520-F	GAGAGACTCATTTTCCATCTCAAAC	116bp	This study
q29g01520-R	TTTGCATTGTTGAGGTTTCC		This study
q05g07400-F	GAAGAAACTGGCGCAGAAAG	168bp	This study
q05g07400-R	GGTTGGTGAGCAGGGAATTA		This study
q453g00010-F	GCTCTCTGTTGGCTTCCATT	169bp	This study
q453g00010-R	CGCGATGAATCAGATGAAAT		This study
q05g08080-F	CAACGATTTGGAATGGGAAA	164 bp	This study
q05g08080-R	GTTTTGCTGGTGGTGCAATA		This study
q07g05920-F	CTTCACAAGTCGTGCCAAGC	195bp	This study
q07g05920-R	TTGTCAAAATGATGGCCAAA		This study
q08g03710-F	CCGGTGGAGTTGGTAAAACTT	112bp	This study
q08g03710-R	GCTGGAAGTGTTATTGTGTGC		This study
q08g07940-F	CGATCATTCAAGAGGCGATA	168bp	This study
q08g07940-R	TTGATGGACTTGGTTGGTCA		This study
q01g05810-F	ATCTTTACTTCGGAACTTGG	61bp	This study
q01g05810-R	CCTCCTCTATCAGACTGTAT		This study
q03g08450-F	CCGAACCATCATCGTTTACA	124bp	This study
q03g08450-R	TCATCGTCCACCAAGAACAC		This study
q68g00050-F	TGTTTGAGCGAATTGCTACTG	152 bp	This study
q68g00050-R	GGTGACAGCTTTGGTTCCTT		This study
