# Supplementary material for: RNA-Seq Analysis Reveals Candidate Targets for Curcumin against Tetranychus cinnabarinus
Source: Biomed Res Int. 2016 Sep 8;2016:2796260. doi: 10.1155/2016/2796260 (PMC5031819; doi:10.1155/2016/2796260)
Supplement: Supplementary file 1 — The supplementary materials include one supplementary figure and 9 supplementary tables. In the supplementary figure (Figure S1), the gene saturation analysis of the sequencing libraries is showed. In the supplementary tables, first, the sequences of all the primers used in this study are provided (Table S1). Then the number of expressed genes and the complete list of differentially expressed genes at both times points are presented (Tables S2 to S5). Furthermore, the details of GO enrichment analysis and KEGG analysis of differentially expressed genes are also provided (Tables S6 to S9). [file 2796260.f1.zip › Supplementary Table S2.xlsx]

## Sheet: Sheet1
Sample	Number of Expressed Genes	Percentage to total number of genes
CK 24 h-1	14613	0.793581
CK 24 h-2	14777	0.802487
CK 48 h-1	14296	0.776366
CK 48 h-2	14559	0.790648
Curcumin 24 h-1	14510	0.787987
Curcumin 24 h-2	14512	0.788096
Curcumin 48 h-1	14326	0.777995
Curcumin 48 h-2	14586	0.792115
