# Supplementary material for: RNA-Seq Analysis Reveals Candidate Targets for Curcumin against Tetranychus cinnabarinus
Source: Biomed Res Int. 2016 Sep 8;2016:2796260. doi: 10.1155/2016/2796260 (PMC5031819; doi:10.1155/2016/2796260)
Supplement: Supplementary file 1 — The supplementary materials include one supplementary figure and 9 supplementary tables. In the supplementary figure (Figure S1), the gene saturation analysis of the sequencing libraries is showed. In the supplementary tables, first, the sequences of all the primers used in this study are provided (Table S1). Then the number of expressed genes and the complete list of differentially expressed genes at both times points are presented (Tables S2 to S5). Furthermore, the details of GO enrichment analysis and KEGG analysis of differentially expressed genes are also provided (Tables S6 to S9). [file 2796260.f1.zip › Supplementary Table S3.xlsx]

## Sheet: Sheet1
GeneID	log2 Fold-change	Description
tetur18g00810	-12.37	Hypothetical protein
tetur118g00010	-9.79	-
tetur02g00040	-9.23	-
tetur17g03956	-8.95	-
tetur16g02830	-8.83	Hypothetical protein
tetur36g00870	-8.81	Hypothetical protein
tetur29g01520	-8.68	Hypothetical protein
tetur20g00180	-8.68	Hypothetical protein
tetur10g00870	-8.49	Hypothetical protein
tetur36g00840	-8.46	Hypothetical protein
tetur05g03470	-8.45	Hypothetical protein
tetur04g04500	-6.33	Hypothetical protein
tetur01g01610	-4.16	Hypothetical protein
tetur17g03730	-3.67	Hypothetical protein
tetur05g07850	-3.07	Hypothetical protein
tetur107g00010	-2.98	Hypothetical protein
tetur06g02000	-2.82	Hypothetical protein
tetur26g02170	-2.76	Hypothetical protein
tetur08g02320	-2.65	Hypothetical protein
tetur13g03350	-2.57	Hypothetical protein
tetur08g01220	-2.53	Hypothetical protein
tetur13g02470	-2.53	Maturase K
tetur05g01410	-2.33	Hypothetical protein
tetur04g03400	-2.28	Hypothetical protein
tetur54g00060	-2.22	Hypothetical protein
tetur20g01050	-2.18	Hypothetical protein
tetur19g01690	-2.16	pABC-21:ABC-transporter, putative
tetur15g02170	-2.12	-
tetur08g07940	-2.08	-
tetur05g00800	-2.07	Hypothetical protein
tetur17g01100	-1.97	Hypothetical protein
tetur08g05150	-1.94	Hypothetical protein
tetur01g07710	-1.85	Hypothetical protein
tetur02g10000	-1.84	Hypothetical protein
tetur03g00200	-1.79	-
tetur03g00210	-1.76	-
tetur12g01560	-1.7	-
tetur08g05720	-1.67	Putative monovalent cation/H+ antiporter subunit B
tetur10g02970	-1.62	PREDICTED: topoisomerase
tetur10g05814	-1.62	-
tetur33g00620	-1.61	Recombination activating protein 1
tetur53g00110	-1.6	Mitochondrial carrier homolog 2
tetur36g00010	-1.6	-
tetur30g00150	-1.55	-
tetur03g08240	-1.48	Hypothetical protein
tetur09g05300	-1.46	-
tetur02g10340	-1.44	Hypothetical protein
tetur17g02630	-1.41	Hypothetical protein
tetur03g06840	-1.4	Hypothetical protein
tetur18g00780	-1.39	Hypothetical protein
tetur09g04900	-1.38	Hypothetical protein
tetur32g02000	-1.36	Hypothetical protein
tetur01g07480	-1.35	Hypothetical protein
tetur16g01420	-1.35	Hypothetical protein TcasGA2_TC015509
tetur15g00540	-1.34	Hypothetical protein
tetur03g00670	-1.32	Hypothetical protein
tetur02g01630	-1.28	Hypothetical protein
tetur11g00210	-1.26	Hypothetical protein
tetur07g08044	-1.25	-
tetur379g00020	-1.25	Talin-1
tetur03g00120	-1.23	-
tetur25g00970	-1.23	Hyperpolarization-activated ion channel
tetur04g04840	-1.22	Hypothetical protein
tetur03g04050	-1.21	Thioredoxin-like protein 4A
tetur04g07610	-1.17	RabGAP/TBC
tetur03g00110	-1.16	-
tetur10g04980	-1.16	Ser/Thr protein kinase, putative
tetur01g07890	-1.15	-
tetur02g14030	-1.14	Hypothetical protein
tetur418g00020	-1.13	Hypothetical protein
tetur21g01920	-1.1	Hypothetical protein
tetur01g05790	-1.05	-
tetur04g05410	-1.03	Hypothetical protein
tetur01g02440	-1.01	Hypothetical protein
tetur02g11970	1	Hypothetical protein
tetur01g01540	1.03	Hypothetical protein Phum_PHUM286960
tetur02g01060	1.05	Hypothetical protein
tetur08g05030	1.07	TuPap-13:Cathepsin B
tetur29g01120	1.08	Hypothetical protein
tetur02g05830	1.09	Hypothetical protein
tetur11g00140	1.14	Hypothetical protein
tetur25g00700	1.18	Hypothetical protein
tetur30g01810	1.18	Hypothetical protein
tetur09g04920	1.24	Apolipoprotein D
tetur23g01700	1.31	-
tetur27g01640	1.33	-
tetur05g08080	1.35	Similar to gamma-aminobutyric acid
tetur06g03000	1.42	Hypothetical protein
tetur09g03650	1.45	TuCPI-5:Cystatin
tetur04g03380	1.51	Hypothetical protein
tetur17g03460	1.61	Hypothetical protein
tetur14g00750	1.62	Hypothetical protein
tetur02g13930	1.84	Hypothetical protein
tetur32g02276	1.88	-
tetur107g00030	1.89	Beclin 1
tetur13g00050	2.03	-
tetur39g00730	2.13	Vitellogenin1
tetur23g01300	2.22	Glycerol-3-phosphate dehydrogenase
tetur06g03770	2.26	-
tetur18g01220	2.37	Hypothetical protein
tetur08g03710	2.72	Ras GTPase
tetur01g03000	2.74	Hypothetical protein
tetur04g04680	3.36	Hypothetical protein
tetur05g09180	3.47	Hypothetical protein
tetur05g07400	4.16	Phospholipase A2, eukaryotic
tetur24g00370	6.15	-
tetur09g02040	8.4	Hypothetical protein
tetur453g00010	8.9	Neuromedin-K receptor
tetur04g07240	9.06	-
tetur02g05380	9.22	Scaffold protein
tetur06g06661	10.42	-
