# Supplementary material for: RNA-Seq Analysis Reveals Candidate Targets for Curcumin against Tetranychus cinnabarinus
Source: Biomed Res Int. 2016 Sep 8;2016:2796260. doi: 10.1155/2016/2796260 (PMC5031819; doi:10.1155/2016/2796260)
Supplement: Supplementary file 1 — The supplementary materials include one supplementary figure and 9 supplementary tables. In the supplementary figure (Figure S1), the gene saturation analysis of the sequencing libraries is showed. In the supplementary tables, first, the sequences of all the primers used in this study are provided (Table S1). Then the number of expressed genes and the complete list of differentially expressed genes at both times points are presented (Tables S2 to S5). Furthermore, the details of GO enrichment analysis and KEGG analysis of differentially expressed genes are also provided (Tables S6 to S9). [file 2796260.f1.zip › Supplementary Table S4.xlsx]

## Sheet: Sheet1
GeneID	log2 Fold-change	Description
tetur05g06160	-11.31	Hypothetical protein
tetur04g07240	-10.61	-
tetur02g00040	-10.38	-
tetur08g03710	-9.4	Ras GTPase
tetur07g05920	-4.8	Guanylate kinase
tetur04g01600	-4.37	Hypothetical protein
tetur14g00750	-3.34	Hypothetical protein
tetur39g00730	-2.69	Vitellogenin1
tetur22g02010	-2.59	SIFa:Neuropeptide precursor
tetur24g02050	-2.59	Hypothetical protein
tetur03g00510	-2.28	Hypothetical protein
tetur08g07940	-2.26	-
tetur05g08080	-2.12	Similar to gamma-aminobutyric acid
tetur03g00110	-2.1	-
tetur14g01500	-2.07	Hypothetical protein
tetur02g14030	-2.03	Hypothetical protein
tetur03g00210	-2.03	-
tetur140g00020	-2.03	Der f 2 allergen
tetur16g02890	-1.97	Hypothetical protein
tetur32g02000	-1.96	Hypothetical protein
tetur10g01920	-1.74	Hypothetical protein
tetur31g01490	-1.73	NEDD8-conjugating enzyme Ubc12
tetur13g00390	-1.64	Hypothetical protein
tetur01g13260	-1.59	Hypothetical protein
tetur03g00120	-1.52	-
tetur01g05880	-1.46	Hypothetical protein
tetur19g00410	-1.46	Hypothetical protein
tetur06g04490	-1.41	-
tetur04g07140	-1.33	Hypothetical protein
tetur09g07530	-1.13	-
tetur28g01480	-1.13	Stress-associated endoplasmic reticulum protein 1
tetur11g05420	-1.09	Hypothetical protein
tetur34g00260	-1.05	Hypothetical protein
tetur03g10143	1.06	hypothetical protein
tetur30g01720	1.1	Hypothetical protein
tetur18g00810	1.1	Hypothetical protein
tetur07g07540	1.13	-
tetur21g00510	1.14	RAB5-interacting protein
tetur09g04860	1.15	Hypothetical protein
tetur12g00720	1.18	Transmembrane protein 20
tetur01g16874	1.19	-
tetur611g00020	1.2	Calnexin
tetur04g06550	1.25	Hypothetical protein
tetur01g04020	1.3	Hypothetical protein
tetur36g00010	1.39	-
tetur05g03410	1.47	PhosphoLipase C family member
tetur06g05230	1.47	Hypothetical protein
tetur29g01430	1.52	Hypothetical protein
tetur09g03650	1.82	TuCPI-5:Cystatin
tetur16g01630	1.88	Hypothetical protein IscW_ISCW001083
tetur37g00540	1.93	Hypothetical protein
tetur01g03510	2.04	Hypothetical protein
tetur640g00010	2.12	-
tetur09g01920	2.18	Hypothetical protein
tetur01g01530	2.36	Hypothetical protein
tetur418g00020	2.39	Hypothetical protein
tetur14g03800	2.49	Similar to PMP1 protein
tetur02g15166	2.57	-
tetur02g04780	2.84	Hypothetical protein
tetur66g00140	2.92	Hypothetical protein
tetur04g02050	2.92	Hypothetical protein IscW_ISCW020080
tetur68g00050	3.42	-
tetur13g04380	3.52	Hypothetical protein
tetur17g03730	5.03	Hypothetical protein
tetur04g01900	6.87	Calmodulin
tetur04g01410	8.73	Hypothetical protein
tetur19g01410	8.75	Hypothetical protein
tetur08g05180	8.77	Hypothetical protein
tetur18g02030	8.81	Hypothetical protein
tetur22g01890	8.85	Hypothetical protein
tetur02g04010	8.94	Hypothetical protein
tetur07g02120	9.13	Hypothetical protein
tetur20g03130	9.15	Hypothetical protein
tetur01g05010	9.37	Hypothetical protein
tetur11g02090	9.51	Hypothetical protein
tetur03g00260	9.59	Hypothetical protein
tetur29g00900	9.63	Hypothetical protein
tetur03g03140	10.2	Hypothetical protein
tetur01g03980	10.22	Hypothetical protein
tetur95g00030	10.36	Hypothetical protein
tetur29g01470	10.45	Unnamed protein product
tetur03g02110	10.54	Hypothetical protein
tetur01g09640	10.74	Hypothetical protein
tetur15g00490	10.82	Hypothetical protein
tetur23g00420	11.08	Hypothetical protein
tetur38g00520	11.38	Hypothetical protein
tetur04g00270	11.75	Hypothetical protein
tetur02g00650	11.8	Hypothetical protein
tetur01g05810	11.94	Exostosin-1
tetur20g00520	12.16	Hypothetical protein
tetur12g01770	12.93	Hypothetical protein
tetur04g07080	13.79	Alpha-D-phosphohexomutase, alpha/beta/alpha I/II/III
tetur07g01210	13.79	Hypothetical protein
tetur03g08460	15.51	Hypothetical protein
tetur03g08470	15.51	Hypothetical protein
tetur03g08450	15.51	Hypothetical protein
