# Supplementary material for: RNA-Seq Analysis Reveals Candidate Targets for Curcumin against Tetranychus cinnabarinus
Source: Biomed Res Int. 2016 Sep 8;2016:2796260. doi: 10.1155/2016/2796260 (PMC5031819; doi:10.1155/2016/2796260)
Supplement: Supplementary file 1 — The supplementary materials include one supplementary figure and 9 supplementary tables. In the supplementary figure (Figure S1), the gene saturation analysis of the sequencing libraries is showed. In the supplementary tables, first, the sequences of all the primers used in this study are provided (Table S1). Then the number of expressed genes and the complete list of differentially expressed genes at both times points are presented (Tables S2 to S5). Furthermore, the details of GO enrichment analysis and KEGG analysis of differentially expressed genes are also provided (Tables S6 to S9). [file 2796260.f1.zip › Supplementary Table S5.xlsx]

## Sheet: Sheet1
Gene ID	Description	log2 fold-change
		24 h post treatment	48 h post treatment
tetur02g00040	Hypothetical protein	-9.23	-10.38
tetur02g14030	Hypothetical protein	-1.14	-2.03
tetur03g00110	Hypothetical protein	-1.16	-2.1
tetur03g00120	Hypothetical protein	-1.23	-1.52
tetur03g00210	Hypothetical protein	-1.76	-2.03
tetur04g07240	Hypothetical protein	9.06	-10.61
tetur05g08080	Similar to gamma-aminobutyric acid	1.35	-2.12
tetur08g03710	Ras GTPase	2.72	-9.4
tetur08g07940	Hypothetical protein	-2.08	-2.26
tetur09g03650	TuCPI-5:Cystatin	1.45	1.82
tetur14g00750	Hypothetical protein	1.62	-3.34
tetur17g03730	Hypothetical protein	-3.67	5.03
tetur18g00810	Hypothetical protein	-12.37	1.1
tetur32g02000	Hypothetical protein	-1.36	-1.96
tetur36g00010	Hypothetical protein	-1.6	1.39
tetur39g00730	Vitellogenin1	2.13	-2.69
tetur418g00020	Hypothetical protein	-1.13	2.39
