# Supplementary material for: RNA-Seq Analysis Reveals Candidate Targets for Curcumin against Tetranychus cinnabarinus
Source: Biomed Res Int. 2016 Sep 8;2016:2796260. doi: 10.1155/2016/2796260 (PMC5031819; doi:10.1155/2016/2796260)
Supplement: Supplementary file 1 — The supplementary materials include one supplementary figure and 9 supplementary tables. In the supplementary figure (Figure S1), the gene saturation analysis of the sequencing libraries is showed. In the supplementary tables, first, the sequences of all the primers used in this study are provided (Table S1). Then the number of expressed genes and the complete list of differentially expressed genes at both times points are presented (Tables S2 to S5). Furthermore, the details of GO enrichment analysis and KEGG analysis of differentially expressed genes are also provided (Tables S6 to S9). [file 2796260.f1.zip › Supplementary Table S6.xlsx]

## Sheet: Sheet1
GO ID	GO Term	Functional Group	Gene ID
GO:0044262	Biological process	cellular carbohydrate metabolic process	tetur01g05790, tetur23g01300
GO:1902578	Biological process	single-organism localization	tetur01g05790,tetur379g00020,tetur02g00040,tetur05g08080, tetur06g03770, tetur23g01300
GO:0098662	Biological process	inorganic cation transmembrane transport	tetur02g00040, tetur06g03770
GO:0098660	Biological process	inorganic ion transmembrane transport	tetur02g00040, tetur06g03770
GO:0044723	Biological process	single-organism carbohydrate metabolic process	tetur01g05790, tetur23g01300
GO:0098655	Biological process	cation transmembrane transport	tetur02g00040, tetur06g03770
GO:0009987	Biological process	cellular process	tetur10g05814,tetur107g00030,tetur06g03770, tetur10g02970, tetur08g03710, tetur03g04050, tetur09g04920,tetur08g05030,tetur379g00020, tetur01g05790,tetur13g00050,tetur453g00010, tetur19g01690, tetur23g01300, tetur02g00040, tetur07g08044
GO:0044765	Biological process	single-organism transport	tetur01g05790, tetur02g00040, tetur05g08080, tetur06g03770, tetur23g01300
GO:0005975	Biological process	carbohydrate metabolic process	tetur01g05790, tetur23g01300
GO:1902589	Biological process	single-organism organelle organization	tetur03g04050,tetur01g05790, tetur379g00020
GO:0051641	Biological process	cellular localization	tetur01g05790,tetur379g00020, tetur23g01300
GO:0034220	Biological process	ion transmembrane transport	tetur02g00040, tetur06g03770
GO:0022008	Biological process	neurogenesis	tetur01g05790, tetur19g01690, tetur23g01300
GO:0006812	Biological process	cation transport	tetur02g00040, tetur06g03770
GO:0051179	Biological process	localization	tetur01g05790,tetur379g00020,tetur02g00040, tetur05g08080, tetur06g03770, tetur23g01300
GO:0009966	Biological process	regulation of signal transduction	tetur04g07610, tetur01g05790
GO:0007166	Biological process	cell surface receptor signaling pathway	tetur453g00010, tetur01g05790
GO:0006810	Biological process	transport	tetur01g05790, tetur02g00040, tetur05g08080, tetur06g03770, tetur23g01300
GO:0051234	Biological process	establishment of localization	tetur01g05790, tetur02g00040, tetur05g08080, tetur06g03770, tetur23g01300
GO:0051649	Biological process	establishment of localization in cell	tetur01g05790, tetur23g01300
GO:0007399	Biological process	nervous system development	tetur01g05790, tetur19g01690, tetur23g01300
GO:0055085	Biological process	transmembrane transport	tetur02g00040, tetur06g03770
GO:0006996	Biological process	organelle organization	tetur03g04050,tetur01g05790, tetur379g00020
GO:0010646	Biological process	regulation of cell communication	tetur04g07610, tetur01g05790
GO:0023051	Biological process	regulation of signaling	tetur04g07610, tetur01g05790
GO:0007165	Biological process	signal transduction	tetur08g03710,tetur453g00010, tetur01g05790
GO:0006811	Biological process	ion transport	tetur02g00040, tetur06g03770
GO:0048583	Biological process	regulation of response to stimulus	tetur04g07610, tetur01g05790
GO:0023052	Biological process	signaling	tetur08g03710,tetur453g00010, tetur01g05790
GO:0044700	Biological process	single organism signaling	tetur08g03710,tetur453g00010, tetur01g05790
GO:0044763	Biological process	single-organism cellular process	tetur01g05790,tetur06g03770,tetur08g03710, tetur453g00010,tetur03g04050,tetur09g04920, tetur19g01690,tetur379g00020,tetur23g01300, tetur02g00040
GO:0042221	Biological process	response to chemical	tetur01g05790, tetur09g04920
GO:0030154	Biological process	cell differentiation	tetur01g05790, tetur19g01690, tetur23g01300
GO:0007154	Biological process	cell communication	tetur08g03710,tetur453g00010, tetur01g05790
GO:0048869	Biological process	cellular developmental process	tetur01g05790, tetur19g01690, tetur23g01300
GO:0051716	Biological process	cellular response to stimulus	tetur08g03710,tetur453g00010, tetur01g05790
GO:0065007	Biological process	biological regulation	tetur08g03710,tetur04g07610,tetur453g00010, tetur01g05790,tetur09g04920,tetur379g00020, tetur02g00040
GO:0050794	Biological process	regulation of cellular process	tetur08g03710,tetur04g07610,tetur453g00010, tetur01g05790, tetur09g04920, tetur02g00040
GO:0050896	Biological process	response to stimulus	tetur08g03710,tetur453g00010,tetur01g05790, tetur09g04920
GO:0044699	Biological process	single-organism process	tetur01g05790, tetur05g08080, tetur06g03770, tetur08g03710,tetur453g00010,tetur03g04050, tetur09g04920, tetur08g05030, tetur19g01690, tetur379g00020,tetur02g00040, tetur23g01300
GO:0050789	Biological process	regulation of biological process	tetur08g03710,tetur04g07610,tetur453g00010, tetur01g05790, tetur09g04920, tetur02g00040
GO:0048731	Biological process	system development	tetur01g05790, tetur19g01690, tetur23g01300
GO:0016043	Biological process	cellular component organization	tetur03g04050,tetur01g05790, tetur379g00020
GO:0044767	Biological process	single-organism developmental process	tetur01g05790, tetur09g04920, tetur19g01690, tetur23g01300
GO:0032502	Biological process	developmental process	tetur01g05790, tetur09g04920, tetur19g01690, tetur23g01300
GO:0071840	Biological process	cellular component organization or biogenesis	tetur03g04050,tetur01g05790, tetur379g00020
GO:0044707	Biological process	single-multicellular organism process	tetur01g05790, tetur09g04920, tetur19g01690, tetur23g01300
GO:0044281	Biological process	small molecule metabolic process	tetur01g05790, tetur23g01300
GO:0019583	Biological process	protein metabolic process	tetur453g00010,tetur01g05790, tetur08g05030
GO:0044238	Biological process	primary metabolic process	tetur03g04050,tetur453g00010,tetur01g05790, tetur09g04920, tetur08g05030, tetur23g01300, tetur07g08044
GO:0032501	Biological process	multicellular organismal process	tetur01g05790, tetur09g04920, tetur19g01690, tetur23g01300
GO:0044237	Biological process	cellular metabolic process	tetur107g00030,tetur03g04050,tetur453g00010,tetur01g05790,tetur23g01300,tetur07g08044,tetur13g00050
GO:0007275	Biological process	multicellular organismal development	tetur01g05790, tetur19g01690, tetur23g01300
GO:0048856	Biological process	anatomical structure development	tetur01g05790, tetur19g01690, tetur23g01300
GO:0006807	Biological process	nitrogen compound metabolic process	tetur03g04050, tetur01g05790, tetur07g08044
GO:0071704	Biological process	organic substance metabolic process	tetur03g04050,tetur453g00010,tetur01g05790, tetur09g04920, tetur08g05030, tetur23g01300, tetur07g08044
GO:0044710	Biological process	single-organism metabolic process	tetur01g05790, tetur09g04920, tetur23g01300
GO:0006139	Biological process	nucleobase-containing compound metabolic process	tetur03g04050, tetur07g08044
GO:0008152	Biological process	metabolic process	tetur107g00030,tetur03g04050,tetur453g00010, tetur01g05790,tetur09g04920,tetur08g05030, tetur23g01300, tetur07g08044, tetur13g00050
GO:0043170	Biological process	macromolecule metabolic process	tetur03g04050,tetur453g00010,tetur01g05790, tetur08g05030
GO:0046483	Biological process	heterocycle metabolic process	tetur03g04050, tetur07g08044
GO:0006725	Biological process	cellular aromatic compound metabolic process	tetur03g04050, tetur07g08044
GO:0034641	Biological process	cellular nitrogen compound metabolic process	tetur03g04050, tetur07g08044
GO:1901360	Biological process	organic cyclic compound metabolic process	tetur03g04050, tetur07g08044
GO:0044260	Biological process	cellular macromolecule metabolic process	tetur03g04050,tetur453g00010, tetur01g05790
GO:0003916	Molecular function	DNA topoisomerase activity	tetur10g05814, tetur10g02970
GO:0016853	Molecular function	isomerase activity	tetur10g05814, tetur10g02970
GO:0005215	Molecular function	transporter activity	tetur19g01690, tetur02g00040, tetur05g08080
GO:0017111	Molecular function	nucleoside-triphosphatase activity	tetur19g01690, tetur07g08044
GO:0046872	Molecular function	metal ion binding	tetur05g08080, tetur07g08044, tetur13g00050
GO:0043169	Molecular function	cation binding	tetur05g08080, tetur07g08044, tetur13g00050
GO:0016462	Molecular function	pyrophosphatase activity	tetur19g01690, tetur07g08044
GO:0016818	Molecular function	hydrolase activity, acting on acid anhydrides, in phosphorus-containing anhydrides	tetur19g01690, tetur07g08044
GO:0016817	Molecular function	hydrolase activity, acting on acid anhydrides	tetur19g01690, tetur07g08044
GO:0022857	Molecular function	transmembrane transporter activity	tetur02g00040, tetur05g08080
GO:0016301	Molecular function	kinase activity	tetur453g00010, tetur13g00050
GO:0005488	Molecular function	binding	tetur10g05814, tetur01g05790, tetur05g08080, tetur12g01560, tetur13g00050, tetur10g02970, tetur08g03710, tetur03g04050, tetur379g00020, tetur07g08044
GO:0003676	Molecular function	nucleic acid binding	tetur10g05814, tetur10g02970, tetur07g08044
GO:0016772	Molecular function	transferase activity, transferring phosphorus-containing groups	tetur453g00010, tetur13g00050
GO:1901363	Molecular function	heterocyclic compound binding	tetur10g05814, tetur08g03710, tetur10g02970, tetur12g01560, tetur07g08044
GO:0097159	Molecular function	organic cyclic compound binding	tetur10g05814, tetur08g03710, tetur10g02970, tetur12g01560, tetur07g08044
GO:0005515	Molecular function	protein binding	tetur03g04050, tetur01g05790, tetur379g00020
GO:0043167	Molecular function	ion binding	tetur05g08080, tetur07g08044, tetur13g00050
GO:0016740	Molecular function	transferase activity	tetur453g00010, tetur01g05790, tetur13g00050
GO:0016787	Molecular function	hydrolase activity	tetur08g05030, tetur19g01690, tetur07g08044
GO:0003824	Molecular function	catalytic activity	tetur10g05814, tetur01g05790, tetur13g00050, tetur10g02970, tetur453g00010, tetur19g01690, tetur08g05030, tetur23g01300, tetur07g08044
GO:0016020	Cellular component	membrane	tetur453g00010,tetur19g01690,tetur02g00040,tetur05g08080, tetur06g03770, tetur23g01300
GO:0016021	Cellular component	integral component of membrane	tetur453g00010, tetur02g00040
GO:0031224	Cellular component	intrinsic component of membrane	tetur453g00010, tetur02g00040
GO:0044425	Cellular component	membrane part	tetur453g00010, tetur02g00040, tetur06g03770
GO:0043229	Cellular component	intracellular organelle	tetur10g05814,tetur10g02970,tetur03g04050, tetur01g05790, tetur08g05030, tetur379g00020, tetur23g01300
GO:0005737	Cellular component	cytoplasm	tetur03g04050,tetur01g05790,tetur09g04920, tetur08g05030, tetur23g01300
GO:0043228	Cellular component	non-membrane-bounded organelle	tetur379g00020, tetur23g01300
GO:0043232	Cellular component	intracellular non-membrane-bounded organelle	tetur379g00020, tetur23g01300
GO:0043226	Cellular component	organelle	tetur10g05814,tetur10g02970,tetur03g04050, tetur01g05790, tetur08g05030, tetur379g00020, tetur23g01300
GO:0032991	Cellular component	macromolecular complex	tetur03g04050, tetur02g00040, tetur06g03770
GO:0043234	Cellular component	protein complex	tetur02g00040, tetur06g03770
GO:0044444	Cellular component	cytoplasmic part	tetur01g05790, tetur08g05030, tetur23g01300
GO:0044424	Cellular component	intracellular part	tetur10g05814,tetur01g05790,tetur10g02970, tetur03g04050, tetur09g04920,tetur08g05030,tetur23g01300,tetur379g00020
GO:0005622	Cellular component	intracellular	tetur10g05814,tetur01g05790,tetur10g02970,tetur03g04050, tetur09g04920,tetur08g05030,tetur23g01300,tetur379g00020
GO:0044446	Cellular component	intracellular organelle part	tetur03g04050, tetur23g01300
GO:0043231	Cellular component	intracellular membrane-bounded organelle	tetur03g04050,tetur01g05790,tetur08g05030,tetur23g01300
GO:0044422	Cellular component	organelle part	tetur03g04050, tetur23g01300
GO:0043227	Cellular component	membrane-bounded organelle	tetur03g04050,tetur01g05790,tetur08g05030, tetur23g01300
GO:0044464	Cellular component	cell part	tetur10g05814,tetur01g05790, tetur10g02970, tetur03g04050, tetur09g04920,tetur08g05030, tetur23g01300, tetur02g00040, tetur379g00020
GO:0005623	Cellular component	cell	tetur10g05814,tetur01g05790, tetur10g02970, tetur03g04050, tetur09g04920,tetur08g05030, tetur23g01300, tetur02g00040, tetur379g00020
