# Supplementary material for: RNA-Seq Analysis Reveals Candidate Targets for Curcumin against Tetranychus cinnabarinus
Source: Biomed Res Int. 2016 Sep 8;2016:2796260. doi: 10.1155/2016/2796260 (PMC5031819; doi:10.1155/2016/2796260)
Supplement: Supplementary file 1 — The supplementary materials include one supplementary figure and 9 supplementary tables. In the supplementary figure (Figure S1), the gene saturation analysis of the sequencing libraries is showed. In the supplementary tables, first, the sequences of all the primers used in this study are provided (Table S1). Then the number of expressed genes and the complete list of differentially expressed genes at both times points are presented (Tables S2 to S5). Furthermore, the details of GO enrichment analysis and KEGG analysis of differentially expressed genes are also provided (Tables S6 to S9). [file 2796260.f1.zip › Supplementary Table S7.xlsx]

## Sheet: Sheet1
GO ID	GO Term	Functional Group	Gene ID
GO:0034765	Biological process	regulation of ion transmembrane transport	tetur04g01900, tetur02g00040
GO:0034762	Biological process	regulation of transmembrane transport	tetur04g01900, tetur02g00040
GO:0043269	Biological process	regulation of ion transport	tetur04g01900, tetur02g00040
GO:0051049	Biological process	regulation of transport	tetur04g01900, tetur02g00040
GO:0032879	Biological process	regulation of localization	tetur04g01900, tetur02g00040
GO:0050794	Biological process	regulation of cellular process	tetur08g03710,tetur04g01900,tetur01g05880,tetur02g00040
GO:0050896	Biological process	response to stimulus	tetur08g03710, tetur04g01900, tetur01g05880
GO:0050789	Biological process	regulation of biological process	tetur08g03710,tetur04g01900,tetur01g05880,tetur02g00040
GO:0044765	Biological process	single-organism transport	tetur02g00040, tetur05g08080
GO:1902578	Biological process	single-organism localization	tetur02g00040, tetur05g08080
GO:0065007	Biological process	biological regulation	tetur08g03710,tetur04g01900,tetur01g05880,tetur02g00040
GO:0006810	Biological process	transport	tetur02g00040, tetur05g08080
GO:0051324	Biological process	establishment of localization	tetur02g00040, tetur05g08080
GO:0051179	Biological process	localization	tetur02g00040, tetur05g08080
GO:0044767	Biological process	single-organism developmental process	tetur04g01900, tetur01g05880
GO:0032502	Biological process	developmental process	tetur04g01900, tetur01g05880
GO:0044707	Biological process	single-multicellular organism process	tetur04g01900, tetur01g05880
GO:0032501	Biological process	multicellular organismal process	tetur04g01900, tetur01g05880
GO:0044260	Biological process	cellular macromolecule metabolic process	tetur10g01920, tetur28g01480
GO:0044699	Biological process	single-organism process	tetur08g03710,tetur04g01900,tetur01g05880,tetur02g00040, tetur05g08080
GO:0043170	Biological process	macromolecule metabolic process	tetur10g01920, tetur28g01480
GO:0008152	Biological process	metabolic process	tetur10g01920,tetur31g01490,tetur04g01900, tetur28g01480
GO:0009987	Biological process	cellular process	tetur08g03710,tetur10g01920,tetur28g01480,tetur01g05880, tetur02g00040
GO:0044763	Biological process	single-organism cellular process	tetur08g03710, tetur01g05880, tetur02g00040
GO:0044238	Biological process	primary metabolic process	tetur10g01920, tetur28g01480
GO:0044237	Biological process	cellular metabolic process	tetur10g01920, tetur28g01480
GO:0071704	Biological process	organic substance metabolic process	tetur10g01920, tetur28g01480
GO:0022857	Molecular function	transmembrane transporter activity	tetur02g00040, tetur05g08080
GO:0005215	Molecular function	transporter activity	tetur02g00040, tetur05g08080
GO:0046872	Molecular function	metal ion binding	tetur04g01900, tetur05g08080
GO:0043169	Molecular function	cation binding	tetur04g01900, tetur05g08080
GO:0005488	Molecular function	binding	tetur08g03710,tetur10g01920,tetur04g01900,tetur05g08080, tetur68g00050
GO:0005515	Molecular function	protein binding	tetur04g01900, tetur68g00050
GO:0043167	Molecular function	ion binding	tetur04g01900, tetur05g08080
GO:1901363	Molecular function	heterocyclic compound binding	tetur08g03710, tetur68g00050
GO:0097159	Molecular function	organic cyclic compound binding	tetur08g03710, tetur68g00050
GO:0003824	Molecular function	catalytic activity	tetur10g01920, tetur31g01490, tetur04g01900
GO:0034704	Cellular component	calcium channel complex	tetur04g01900, tetur02g00040
GO:0034703	Cellular component	cation channel complex	tetur04g01900, tetur02g00040
GO:0034702	Cellular component	ion channel complex	tetur04g01900, tetur02g00040
GO:1902495	Cellular component	transmembrane transporter complex	tetur04g01900, tetur02g00040
GO:1990351	Cellular component	transporter complex	tetur04g01900, tetur02g00040
GO:0032991	Cellular component	macromolecular complex	tetur04g01900,tetur28g01480,tetur02g00040,tetur68g00050
GO:0043228	Cellular component	non-membrane-bounded organelle	tetur04g01900, tetur28g01480, tetur68g00050
GO:0043232	Cellular component	intracellular non-membrane-bounded organelle	tetur04g01900, tetur28g01480, tetur68g00050
GO:0043234	Cellular component	protein complex	tetur04g01900, tetur02g00040, tetur68g00050
GO:0016021	Cellular component	integral component of membrane	tetur04g01900, tetur02g00040
GO:0031224	Cellular component	intrinsic component of membrane	tetur04g01900, tetur02g00040
GO:0044425	Cellular component	membrane part	tetur04g01900, tetur02g00040
GO:0016020	Cellular component	membrane	tetur04g01900, tetur02g00040, tetur05g08080
GO:0005634	Cellular component	nucleus	tetur04g01900, tetur68g00050
GO:0044446	Cellular component	intracellular organelle part	tetur04g01900, tetur68g00050
GO:0044422	Cellular component	organelle part	tetur04g01900, tetur68g00050
GO:0043231	Cellular component	intracellular membrane-bounded organelle	tetur04g01900, tetur28g01480, tetur68g00050
GO:0044444	Cellular component	cytoplasmic part	tetur04g01900, tetur28g01480
GO:0043227	Cellular component	membrane-bounded organelle	tetur04g01900, tetur28g01480, tetur68g00050
GO:0043229	Cellular component	intracellular organelle	tetur04g01900, tetur28g01480, tetur68g00050
GO:0044464	Cellular component	cell part	tetur04g01900,tetur28g01480,tetur01g05880,tetur02g00040, tetur68g00050
GO:0005623	Cellular component	cell	tetur04g01900, tetur28g01480, tetur01g05880, tetur02g00040, tetur68g00050
GO:0043226	Cellular component	organelle	tetur04g01900, tetur28g01480, tetur68g00050
GO:0005737	Cellular component	cytoplasm	tetur04g01900, tetur28g01480
GO:0005622	Cellular component	intracellular	tetur04g01900, tetur28g01480, tetur01g05880, tetur68g00050
GO:0044424	Cellular component	intracellular part	tetur04g01900, tetur28g01480, tetur68g00050
