# Supplementary material for: RNA-Seq Analysis Reveals Candidate Targets for Curcumin against Tetranychus cinnabarinus
Source: Biomed Res Int. 2016 Sep 8;2016:2796260. doi: 10.1155/2016/2796260 (PMC5031819; doi:10.1155/2016/2796260)
Supplement: Supplementary file 1 — The supplementary materials include one supplementary figure and 9 supplementary tables. In the supplementary figure (Figure S1), the gene saturation analysis of the sequencing libraries is showed. In the supplementary tables, first, the sequences of all the primers used in this study are provided (Table S1). Then the number of expressed genes and the complete list of differentially expressed genes at both times points are presented (Tables S2 to S5). Furthermore, the details of GO enrichment analysis and KEGG analysis of differentially expressed genes are also provided (Tables S6 to S9). [file 2796260.f1.zip › Supplementary Table S8.xlsx]

## Sheet: Sheet1
Pathway ID	Pathway	Gene ID
ko04141	Protein processing in endoplasmic reticulum	tetur32g02000,tetur03g00200,tetur03g00110,tetur03g00210, tetur03g00120, tetur08g07940
ko03440	Homologous recombination	tetur10g02970, tetur10g05814
ko03460	Fanconi anemia pathway	tetur10g02970, tetur10g05814
ko04666	Fc gamma R-mediated phagocytosis	tetur12g01560, tetur05g07400
ko00534	Glycosaminoglycan biosynthesis - heparan sulfate	tetur01g05790
ko00565	Ether lipid metabolism	tetur05g07400
ko04140	Regulation of autophagy	tetur107g00030
ko00564	Glycerophospholipid metabolism	tetur23g01300, tetur05g07400
ko04726	Serotonergic synapse	tetur05g08080, tetur05g07400
ko04664	Fc epsilon RI signaling pathway	tetur05g07400
ko00592	alpha-Linolenic acid metabolism	tetur05g07400
ko00620	Pyruvate metabolism	tetur13g00050
ko04370	VEGF signaling pathway	tetur05g07400
ko04010	MAPK signaling pathway	tetur02g00040, tetur05g07400
ko04930	Type II diabetes mellitus	tetur13g00050
ko00010	Glycolysis / Gluconeogenesis	tetur13g00050
ko04730	Long-term depression	tetur05g07400
ko05016	Huntington's disease	tetur06g03770, tetur19g01690
ko04510	Focal adhesion	tetur379g00020, tetur02g05830
ko05131	Shigellosis	tetur12g01560
ko00591	Linoleic acid metabolism	tetur05g07400
ko04975	Fat digestion and absorption	tetur05g07400
ko00590	Arachidonic acid metabolism	tetur05g07400
ko05100	Bacterial invasion of epithelial cells	tetur12g01560
ko05132	Salmonella infection	tetur12g01560
ko00190	Oxidative phosphorylation	tetur06g03770
ko05012	Parkinson's disease	tetur06g03770
ko04520	Adherens junction	tetur12g01560
ko04110	Cell cycle	tetur118g00010
ko04114	Oocyte meiosis	tetur118g00010
ko03018	RNA degradation	tetur04g07240
ko04912	GnRH signaling pathway	tetur05g07400
ko04612	Antigen processing and presentation	tetur08g05030
ko04512	ECM-receptor interaction	tetur02g05830
ko05145	Toxoplasmosis	tetur05g07400
ko02010	ABC transporters	tetur19g01690
ko04974	Protein digestion and absorption	tetur02g05830
ko04970	Salivary secretion	tetur09g03650
ko04972	Pancreatic secretion	tetur05g07400
ko04724	Glutamatergic synapse	tetur05g07400
ko04270	Vascular smooth muscle contraction	tetur05g07400
ko05010	Alzheimer's disease	tetur06g03770
ko03040	Spliceosome	tetur03g04050
ko05146	Amoebiasis	tetur02g05830
ko04810	Regulation of actin cytoskeleton	tetur12g01560
ko00230	Purine metabolism	tetur13g00050
ko05166	HTLV-I infection	tetur379g00020
ko01100	Metabolic pathways	tetur01g05790,tetur06g03770,tetur05g07400,tetur13g00050
ko04142	Lysosome	tetur08g05030
