# Supplementary material for: RNA-Seq Analysis Reveals Candidate Targets for Curcumin against Tetranychus cinnabarinus
Source: Biomed Res Int. 2016 Sep 8;2016:2796260. doi: 10.1155/2016/2796260 (PMC5031819; doi:10.1155/2016/2796260)
Supplement: Supplementary file 1 — The supplementary materials include one supplementary figure and 9 supplementary tables. In the supplementary figure (Figure S1), the gene saturation analysis of the sequencing libraries is showed. In the supplementary tables, first, the sequences of all the primers used in this study are provided (Table S1). Then the number of expressed genes and the complete list of differentially expressed genes at both times points are presented (Tables S2 to S5). Furthermore, the details of GO enrichment analysis and KEGG analysis of differentially expressed genes are also provided (Tables S6 to S9). [file 2796260.f1.zip › Supplementary Table S9.xlsx]

## Sheet: Sheet1
Pathway ID	Pathway	Gene ID
ko04141	Protein processing in endoplasmic reticulum	tetur32g02000,tetur03g00110,tetur03g00210,tetur03g00120, tetur08g07940, tetur611g00020
ko04070	Phosphatidylinositol signaling system	tetur04g01900, tetur05g03410
ko05034	Alcoholism	tetur04g01900, tetur68g00050
ko04970	Salivary secretion	tetur04g01900, tetur09g03650
ko04020	Calcium signaling pathway	tetur04g01900, tetur05g03410
ko05322	Systemic lupus erythematosus	tetur68g00050
ko04745	Phototransduction - fly	tetur04g01900
ko04744	Phototransduction	tetur04g01900
ko05133	Pertussis	tetur04g01900
ko05202	Transcriptional misregulation in cancer	tetur01g16874, tetur03g10143
ko05214	Glioma	tetur04g01900
ko04740	Olfactory transduction	tetur04g01900
ko00562	Inositol phosphate metabolism	tetur05g03410
ko04720	Long-term potentiation	tetur04g01900
ko04971	Gastric acid secretion	tetur04g01900
ko00520	Amino sugar and nucleotide sugar metabolism	tetur04g07080
ko04916	Melanogenesis	tetur04g01900
ko04722	Neurotrophin signaling pathway	tetur04g01900
ko00310	Lysine degradation	tetur01g16874
ko04114	Oocyte meiosis	tetur04g01900
ko03018	RNA degradation	tetur04g07240
ko04912	GnRH signaling pathway	tetur04g01900
ko04612	Antigen processing and presentation	tetur611g00020
ko05031	Amphetamine addiction	tetur04g01900
ko05152	Tuberculosis	tetur04g01900
ko04530	Tight junction	tetur07g05920
ko04910	Insulin signaling pathway	tetur04g01900
ko04145	Phagosome	tetur611g00020
ko05110	Vibrio cholerae infection	tetur10g01920
ko04270	Vascular smooth muscle contraction	tetur04g01900
ko04728	Dopaminergic synapse	tetur04g01900
ko04726	Serotonergic synapse	tetur05g08080
ko04120	Ubiquitin mediated proteolysis	tetur31g01490
ko05010	Alzheimer's disease	tetur04g01900
ko03040	Spliceosome	tetur21g00510
ko05146	Amoebiasis	tetur10g01920
ko04010	MAPK signaling pathway	tetur02g00040
ko05166	HTLV-I infection	tetur611g00020
ko04142	Lysosome	tetur140g00020
ko01100	Metabolic pathways	tetur05g03410
